# Supplementary material for: Biological effects of electron beam to target turning X-ray (EBTTX) on two freesia (Freesia hybrida) cultivars
Source: PeerJ. 2021 Jan 28;9:e10742. doi: 10.7717/peerj.10742 (PMC7847710; doi:10.7717/peerj.10742)
Supplement: Supplemental Information 1 [file peerj-09-10742-s001.xlsx]

## Sheet: Sheet1
					Germination rates (%)
					0 Gy			25 Gy			50 Gy			75 Gy			100 Gy
			Varieties	Time (day)	repeat 1	repeat 2	repeat 3	repeat 1	repeat 2	repeat 3	repeat 1	repeat 2	repeat 3	repeat 1	repeat 2	repeat 3	repeat 1	repeat 2	repeat 3
			Red freesia	10	40	45	50	35	30	40	0	5	0	0	0	0	0	0	0
				20	75	60	85	55	70	75	15	20	20	0	0	0	0	0	0
					Survival rate (%)
					0 Gy			25 Gy			50 Gy			75 Gy			100 Gy
			Varieties	Time (day)	repeat 1	repeat 2	repeat 3	repeat 1	repeat 2	repeat 3	repeat 1	repeat 2	repeat 3	repeat 1	repeat 2	repeat 3	repeat 1	repeat 2	repeat 3
			Red freesia	30	90	70	90	70	80	85	50	35	35	5	0	0	0	0	0
				40	95	85	100	75	90	100	65	50	60	5	5	0	0	0	0
				50	100	85	100	75	90	100	85	65	70	5	5	0	0	0	0
				60	100	85	100	75	90	100	85	65	70	5	5	0	0	0	0
				70	100	85	100	75	90	100	85	70	70	5	5	0	0	0	0
				80	100	85	100	75	90	100	85	70	70	5	5	0	0	0	0
					Germination rates (%)
					0 Gy			25 Gy			50 Gy			75 Gy			100 Gy
			Varieties	Time (day)	repeat 1	repeat 2	repeat 3	repeat 1	repeat 2	repeat 3	repeat 1	repeat 2	repeat 3	repeat 1	repeat 2	repeat 3	repeat 1	repeat 2	repeat 3
			Purple freesia	10	40	55	60	40	50	40	15	20	15	0	0	0	0	0	0
				20	60	70	75	55	75	60	40	55	40	0	0	0	0	0	0
					Survival rate (%)
					0 Gy			25 Gy			50 Gy			75 Gy			100 Gy
			Varieties	Time (day)	repeat 1	repeat 2	repeat 3	repeat 1	repeat 2	repeat 3	repeat 1	repeat 2	repeat 3	repeat 1	repeat 2	repeat 3	repeat 1	repeat 2	repeat 3
			Purple freesia	30	85	75	90	70	75	85	60	70	85	5	10	10	0	0	0
				40	90	80	90	70	80	95	60	70	85	10	10	20	0	0	0
				50	90	80	95	75	80	95	65	70	85	15	15	20	0	0	0
				60	90	80	95	75	80	95	70	75	90	15	15	20	0	0	0
				70	90	80	95	75	80	95	75	80	90	15	15	20	0	0	0
				80	90	80	95	75	80	95	75	80	90	15	15	20	0	0	0
					Plant height (cm)
					0 Gy			25 Gy			50 Gy			75 Gy			100 Gy
			Varieties	Time (day)	repeat 1	repeat 2	repeat 3	repeat 1	repeat 2	repeat 3	repeat 1	repeat 2	repeat 3	repeat 1	repeat 2	repeat 3	repeat 1	repeat 2	repeat 3
			Red freesia	10	2.37	2.75	2.25	3.25	3.88	3.19	0.08	0.08	0.11	0	0	0	0	0	0
				20	11.17	12.71	11.19	8.44	10.13	9.39	1.98	2.38	1.83	0	0	0	0	0	0
				30	17.05	19.59	18.19	15.6	16.88	16.51	5.1	6.57	5.48	1.05	1.67	1.27	0	0	0
				40	22.41	25.8	22.51	20.81	23.03	21.43	6.53	7.25	6.78	2.01	2.9	2.34	0	0	0
				50	27.24	31.21	28.64	24.42	26.53	24.96	7.45	8.2	7.88	3.01	3.98	3.11	0	0	0
				60	30.87	33.93	31.64	27.43	29.51	27.56	8.62	9.92	9.07	4.12	5.01	4.32	0	0	0
				70	33.01	35.83	33.9	28.29	30.88	28.8	8.91	10.57	9.45	5.29	6.42	5.64	0	0	0
				80	33.01	35.83	33.9	28.29	30.88	28.8	8.91	10.57	9.45	5.47	6.66	5.82	0	0	0
					Plant height (cm)
					0 Gy			25 Gy			50 Gy			75 Gy			100 Gy
			Varieties	Time (day)	repeat 1	repeat 2	repeat 3	repeat 1	repeat 2	repeat 3	repeat 1	repeat 2	repeat 3	repeat 1	repeat 2	repeat 3	repeat 1	repeat 2	repeat 3
			Purple freesia	10	3.98	4.84	3.82	3.13	4.01	2.98	2.64	1.67	1.4	0	0	0	0	0	0
				20	13.75	15.61	12.55	10.18	10.06	9.87	3.64	4.58	3.62	0	0	0	0	0	0
				30	23.15	24.94	20.05	17.27	21.21	16.92	6.42	8.04	6.08	2.44	3.5	2.56	0	0	0
				40	28.14	32.39	29.06	20.47	24.83	20.92	7.65	10.9	9.09	3.04	4.26	3.71	0	0	0
				50	33.69	38.36	34.42	24.91	29.4	22.4	9.51	12.16	10.47	5.02	6.59	5.92	0	0	0
				60	38.47	42.1	37.19	26.62	32.61	27.51	9.73	13.28	10.86	5.76	7.5	6.62	0	0	0
				70	38.97	44.61	37.66	27.3	34.67	28.31	9.88	13.68	11.23	6.37	7.93	7.11	0	0	0
				80	38.97	44.61	37.66	27.3	34.67	28.31	9.88	13.68	11.23	6.37	7.93	7.11	0	0	0
					Leaf number
					0 Gy			25 Gy			50 Gy			75 Gy			100 Gy
				Varieties	repeat 1	repeat 2	repeat 3	repeat 1	repeat 2	repeat 3	repeat 1	repeat 2	repeat 3	repeat 1	repeat 2	repeat 3	repeat 1	repeat 2	repeat 3
				Red freesia	5.63	5.01	5.51	5.49	4.32	5.34	3.54	2.62	3.36	1.36	0.91	1.24	0	0	0
				Purple freesia	6.58	5.51	5.6	5.4	5.08	5.13	4.42	3.76	3.83	2.14	1.71	1.64	0	0	0
					Leaf area (cm2)
					0 Gy			25 Gy			50 Gy			75 Gy			100 Gy
				Varieties	repeat 1	repeat 2	repeat 3	repeat 1	repeat 2	repeat 3	repeat 1	repeat 2	repeat 3	repeat 1	repeat 2	repeat 3	repeat 1	repeat 2	repeat 3
				Red freesia	25.86	23.01	27.49	16.46	14.18	19.31	6.08	4.82	4.85	1.62	1.42	1.28	0	0	0
				Purple freesia	29.55	23.28	27.42	26.27	19.76	24.01	6.53	5.98	4.94	1.41	1.87	1.83	0	0	0
					Root number
					0 Gy			25 Gy			50 Gy			75 Gy			100 Gy
				Varieties	repeat 1	repeat 2	repeat 3	repeat 1	repeat 2	repeat 3	repeat 1	repeat 2	repeat 3	repeat 1	repeat 2	repeat 3	repeat 1	repeat 2	repeat 3
				Red freesia	9.7	11.18	8.12	5.66	6.34	5.01	3.58	3.22	2.71	1.43	1.1	0.98	0	0	0
				Purple freesia	10.21	8.55	8.25	7.33	6.46	6.23	3.36	4.32	3.34	2.49	3.05	2.48	0	0	0
					Root length (cm)
					0 Gy			25 Gy			50 Gy			75 Gy			100 Gy
				Varieties	repeat 1	repeat 2	repeat 3	repeat 1	repeat 2	repeat 3	repeat 1	repeat 2	repeat 3	repeat 1	repeat 2	repeat 3	repeat 1	repeat 2	repeat 3
				Red freesia	7.27	7.41	6.42	3.85	4.05	4.49	3.44	2.81	3.94	2.28	2.03	2.67	0	0	0
				Purple freesia	11.15	10.04	9.79	6.55	6.64	7.59	5.17	5.31	6.03	3.18	3.33	2.88	0	0	0
					Flowering rate (%)
					0 Gy			25 Gy			50 Gy			75 Gy			100 Gy
				Varieties	repeat 1	repeat 2	repeat 3	repeat 1	repeat 2	repeat 3	repeat 1	repeat 2	repeat 3	repeat 1	repeat 2	repeat 3	repeat 1	repeat 2	repeat 3
				Red freesia	91.31	72.82	80.88	83.96	68.11	75.92	25.41	27.45	23.47	12.11	13.45	10.82	0	0	0
				Purple freesia	97.98	97.52	84.49	82.49	81.63	74.2	37.03	32.03	37.25	17.01	15.38	15.95	0	0	0
					Flower number
					0 Gy			25 Gy			50 Gy			75 Gy			100 Gy
				Varieties	repeat 1	repeat 2	repeat 3	repeat 1	repeat 2	repeat 3	repeat 1	repeat 2	repeat 3	repeat 1	repeat 2	repeat 3	repeat 1	repeat 2	repeat 3
				Red freesia	12.23	12.33	13.46	10.56	9.67	12.79	5.23	5.08	6.73	1.94	2.68	2.38	0	0	0
				Purple freesia	12.72	13.66	16.61	12.05	12.99	15.98	7.78	8.01	10.23	3.87	2.92	4.22	0	0	0
					Pollen vigor (%)
					0 Gy			25 Gy			50 Gy			75 Gy			100 Gy
				Varieties	repeat 1	repeat 2	repeat 3	repeat 1	repeat 2	repeat 3	repeat 1	repeat 2	repeat 3	repeat 1	repeat 2	repeat 3	repeat 1	repeat 2	repeat 3
				Red freesia	86.94	101.59	91.46	62.61	70.54	64.2	36.47	41.42	36.42	14.67	12.59	13.06	0	0	0
				Purple freesia	87.21	83.5	74.31	58.83	63.87	57.63	34.08	38.56	33.35	11.08	11.56	12.7	0	0	0
					Total chlorophyll content (mg/kg)
					0 Gy			25 Gy			50 Gy			75 Gy			100 Gy
				Varieties	repeat 1	repeat 2	repeat 3	repeat 1	repeat 2	repeat 3	repeat 1	repeat 2	repeat 3	repeat 1	repeat 2	repeat 3	repeat 1	repeat 2	repeat 3
				Red freesia	0.42	0.44	0.37	0.62	0.57	0.51	0.43	0.37	0.37	0.23	0.19	0.21	0	0	0
				Purple freesia	0.69	0.72	0.57	0.89	0.71	0.86	0.68	0.54	0.64	0.48	0.38	0.44	0	0	0
					MDA content (nmol/g)
					0 Gy			25 Gy			50 Gy			75 Gy			100 Gy
				Varieties	repeat 1	repeat 2	repeat 3	repeat 1	repeat 2	repeat 3	repeat 1	repeat 2	repeat 3	repeat 1	repeat 2	repeat 3	repeat 1	repeat 2	repeat 3
				Red freesia	35.21	41.58	39.44	41.89	45.88	46.68	53.89	63.33	48.67	95.66	70.11	85.45	0	0	0
				Purple freesia	45.68	36.41	45.47	36.28	42.57	36.69	46.28	42.72	57.02	66.94	53.45	57.72	0	0	0
